# Supplementary material
Source: PubMed Central journal article supplement (PMC155679)
Supplement: 1477-7525-1-15-S1.pdf [file 1477-7525-1-15-S1.pdf]

## AMS-Fragebogen

Welche der folgenden Beschwerden haben Sie zur Zeit? Kreuzen Sie bitte für jede Beschwerde an, wie stark Sie davon betroffen sind. Wenn Sie eine Beschwerde nicht haben, kreuzen Sie bitte „Keine“ an.

### Beschwerden:

|                                                                                                                                                                                                                                                             |                          | keine<br> -----          | leichte<br> -----        | mittlere<br> -----       | starke<br> -----         | sehr<br>starke<br> ----- |
|-------------------------------------------------------------------------------------------------------------------------------------------------------------------------------------------------------------------------------------------------------------|--------------------------|--------------------------|--------------------------|--------------------------|--------------------------|--------------------------|
| Punkte =                                                                                                                                                                                                                                                    |                          | 1                        | 2                        | 3                        | 4                        | 5                        |
| 1. <b>Verschlechterung des allgemeinen Wohlbefindens</b><br>(Gesundheitszustand, subjektives Gesundheitsempfinden) ....                                                                                                                                     | <input type="checkbox"/> |
| 2. <b>Gelenk- und Muskelbeschwerden</b><br>(Kreuz-, Gelenk-, Gliederschmerzen, Rückenschmerzen) .....                                                                                                                                                       | <input type="checkbox"/> |
| 3. <b>Starkes Schwitzen</b> (unerwartete/plötzliche Schweiß-<br>ausbrüche, Hitzewallungen unabhängig von Belastung) .....                                                                                                                                   | <input type="checkbox"/> |
| 4. <b>Schlafstörungen</b> (Einschlafstörungen, Durchschlaf-<br>störungen, zu frühes und müdes Aufwachen, schlecht<br>Schlafen, Schlaflosigkeit) .....                                                                                                       | <input type="checkbox"/> |
| 5. <b>Erhöhtes Schlafbedürfnis, häufig müde</b> .....                                                                                                                                                                                                       | <input type="checkbox"/> |
| 6. <b>Reizbarkeit</b> (Aggressivität, durch Kleinigkeiten<br>schnell aufgebracht, mißgestimmt) .....                                                                                                                                                        | <input type="checkbox"/> |
| 7. <b>Nervosität</b> (innere Anspannung, innere Unruhe,<br>nicht stillsitzen können) .....                                                                                                                                                                  | <input type="checkbox"/> |
| 8. <b>Ängstlichkeit</b> (Panik) .....                                                                                                                                                                                                                       | <input type="checkbox"/> |
| 9. <b>Körperliche Erschöpfung/Nachlassen der Tatkraft</b><br>(allgemeine Leistungsminderung, Abnahme der Aktivität,<br>fehlende Lust zu Unternehmungen, Gefühl, weniger zu<br>schaffen, zu erreichen, sich antreiben müssen, etwas<br>zu unternehmen) ..... | <input type="checkbox"/> |
| 10. <b>Abnahme der Muskelkraft</b> (Schwächegefühl) .....                                                                                                                                                                                                   | <input type="checkbox"/> |
| 11. <b>Depressive Verstimmung</b> (Mutlosigkeit, Traurigkeit,<br>Weinerlichkeit, Antriebslosigkeit, Stimmungss-<br>chwankungen, Gefühl der Sinnlosigkeit) .....                                                                                             | <input type="checkbox"/> |
| 12. <b>Gefühl, Höhepunkt des Lebens ist überschritten</b> .....                                                                                                                                                                                             | <input type="checkbox"/> |
| 13. <b>Entmutigt fühlen, Totpunkt erreicht</b> .....                                                                                                                                                                                                        | <input type="checkbox"/> |
| 14. <b>Verminderter Bartwuchs</b> .....                                                                                                                                                                                                                     | <input type="checkbox"/> |
| 15. <b>Nachlassen der Potenz</b> .....                                                                                                                                                                                                                      | <input type="checkbox"/> |
| 16. <b>Abnahme der Anzahl morgendlicher Erektionen</b> .....                                                                                                                                                                                                | <input type="checkbox"/> |
| 17. <b>Abnahme der Libido</b><br>(Spaß am Sex, Lust auf Sexualverkehr) .....                                                                                                                                                                                | <input type="checkbox"/> |

Haben Sie andere wesentliche Beschwerden?

Ja ..... ☐

Nein ..... ☐

Wenn Ja, bitte angeben: \_\_\_\_\_

\_\_\_\_\_

VIELEN DANK FÜR IHRE MITARBEIT
