# Supplementary material
Source: PubMed Central journal article supplement (PMC155679)
Supplement: 1477-7525-1-15-S2.pdf [file 1477-7525-1-15-S2.pdf]

## AMS Questionnaire

Which of the following symptoms apply to you at this time? Please, mark the appropriate box for each symptom. For symptoms that do not apply, please mark "none".

**Symptoms:**

|                                                                                                                                                                                                                                                                  |         | none                     | mild                     | moderate                 | severe                   | extremely<br>severe      |
|------------------------------------------------------------------------------------------------------------------------------------------------------------------------------------------------------------------------------------------------------------------|---------|--------------------------|--------------------------|--------------------------|--------------------------|--------------------------|
|                                                                                                                                                                                                                                                                  | Score = | 1                        | 2                        | 3                        | 4                        | 5                        |
| 1. <b>Decline in your feeling of general well-being</b><br>(general state of health, subjective feeling).....                                                                                                                                                    |         | <input type="checkbox"/> |
| 2. <b>Joint pain and muscular ache</b> (lower back pain,<br>joint pain, pain in a limb, general back ache).....                                                                                                                                                  |         | <input type="checkbox"/> |
| 3. <b>Excessive sweating</b> (unexpected/sudden episodes<br>of sweating, hot flushes independent of strain).....                                                                                                                                                 |         | <input type="checkbox"/> |
| 4. <b>Sleep problems</b> (difficulty in falling asleep, difficulty<br>in sleeping through, waking up early and feeling tired,<br>poor sleep, sleeplessness) .....                                                                                                |         | <input type="checkbox"/> |
| 5. <b>Increased need for sleep, often feeling tired</b> .....                                                                                                                                                                                                    |         | <input type="checkbox"/> |
| 6. <b>Irritability</b> (feeling aggressive, easily upset about<br>little things, moody) .....                                                                                                                                                                    |         | <input type="checkbox"/> |
| 7. <b>Nervousness</b> (inner tension, restlessness, feeling fidgety) ....                                                                                                                                                                                        |         | <input type="checkbox"/> |
| 8. <b>Anxiety</b> (feeling panicky) .....                                                                                                                                                                                                                        |         | <input type="checkbox"/> |
| 9. <b>Physical exhaustion / lacking vitality</b> (general decrease<br>in performance, reduced activity, lacking interest in leisure<br>activities, feeling of getting less done, of achieving less, of<br>having to force oneself to undertake activities) ..... |         | <input type="checkbox"/> |
| 10. <b>Decrease in muscular strength</b> (feeling of weakness) .....                                                                                                                                                                                             |         | <input type="checkbox"/> |
| 11. <b>Depressive mood</b> (feeling down, sad, on the verge of tears,<br>lack of drive, mood swings, feeling nothing is of any use) .....                                                                                                                        |         | <input type="checkbox"/> |
| 12. <b>Feeling that you have passed your peak</b> .....                                                                                                                                                                                                          |         | <input type="checkbox"/> |
| 13. <b>Feeling burnt out, having hit rock-bottom</b> .....                                                                                                                                                                                                       |         | <input type="checkbox"/> |
| 14. <b>Decrease in beard growth</b> .....                                                                                                                                                                                                                        |         | <input type="checkbox"/> |
| 15. <b>Decrease in ability/frequency to perform sexually</b> .....                                                                                                                                                                                               |         | <input type="checkbox"/> |
| 16. <b>Decrease in the number of morning erections</b> .....                                                                                                                                                                                                     |         | <input type="checkbox"/> |
| 17. <b>Decrease in sexual desire/libido</b> (lacking pleasure in sex,<br>lacking desire for sexual intercourse) .....                                                                                                                                            |         | <input type="checkbox"/> |

Have you got any other major symptoms?                      Yes.....                       No.....

If Yes, please describe: \_\_\_\_\_

\_\_\_\_\_

**THANK YOU VERY MUCH FOR YOUR COOPERATION**
