# Supplementary material
Source: PubMed Central journal article supplement (PMC155679)
Supplement: 1477-7525-1-15-S3.pdf [file 1477-7525-1-15-S3.pdf]

Vilka av följande symtom passar in på dig idag? Var vänlig och kryssa i den ruta som är lämpligast för varje symtom. För symtom som inte är relevanta markerar du alternativet "inga".

**Symtom:**

|                                                                                                                                                                                                                                                                               | inga                     | lätt                     | lindrig                  | svår                     | mycket<br>svår           |
|-------------------------------------------------------------------------------------------------------------------------------------------------------------------------------------------------------------------------------------------------------------------------------|--------------------------|--------------------------|--------------------------|--------------------------|--------------------------|
|                                                                                                                                                                                                                                                                               | -----                    | -----                    | -----                    | -----                    |                          |
| Poäng                                                                                                                                                                                                                                                                         | = 1                      | 2                        | 3                        | 4                        | 5                        |
| 1. <b>En känsla av minskat allmänt välbefinnande</b><br>(allmänt hälsotillstånd, subjektiv känsla).....                                                                                                                                                                       | <input type="checkbox"/> |
| 2. <b>Smärta i leder och muskelvärk</b> (smärta i ländryggen,<br>ledvärk, smärta i ben eller armar, allmänna ryggbesvär).....                                                                                                                                                 | <input type="checkbox"/> |
| 3. <b>Svåra svettningar</b> (oväntade/plötsliga tillfällen<br>av svettningar, svettningar ej relaterade till ansträngning).....                                                                                                                                               | <input type="checkbox"/> |
| 4. <b>Sömnpblem</b> (svårighet vid insomning, svårighet att sova<br>utan sömnstörningar/avbrott, vaknar tidigt med en känsla<br>av trötthet, dålig sömn, sömnlöshet) .....                                                                                                    | <input type="checkbox"/> |
| 5. <b>Ökat sömnbehov, känner mig ofta trött</b> .....                                                                                                                                                                                                                         | <input type="checkbox"/> |
| 6. <b>Lättretlighet</b> (känsla av irritation/aggressivitet, blir lätt<br>upprörd för småsaker, lynnighet) .....                                                                                                                                                              | <input type="checkbox"/> |
| 7. <b>Nervositet</b> (inre spändhet, oro/rastlöshet, känsla av otålighet)                                                                                                                                                                                                     | <input type="checkbox"/> |
| 8. <b>Ängslan</b> (panikkänsla).....                                                                                                                                                                                                                                          | <input type="checkbox"/> |
| 9. <b>Fysisk utmattning / brist på vitalitet</b> (allmänt försämrad<br>prestationsförmåga, mindre aktiv, bristande intresse för<br>fritidsaktiviteter, en känsla av att få mindre gjort, av att utträta<br>mindre, av att behöva tvinga sig själv för att företa aktiviteter) | <input type="checkbox"/> |
| 10. <b>Avtagande muskelstyrka</b> (känsla av svaghet).....                                                                                                                                                                                                                    | <input type="checkbox"/> |
| 11. <b>Depressiv sinnesstämning</b> (nedstämd, dyster/ledsen, på gränsen till tårar, orkeslöshet,<br>humörsvängningar, en känsla av att inget nyttjar något till) .....                                                                                                       | <input type="checkbox"/> |
| 12. <b>En känsla av att du passerat din toppnivå</b> .....                                                                                                                                                                                                                    | <input type="checkbox"/> |
| 13. <b>Känsla av utbrändhet, har nått absoluta botten</b> .....                                                                                                                                                                                                               | <input type="checkbox"/> |
| 14. <b>Avtagande skäggväxt</b> .....                                                                                                                                                                                                                                          | <input type="checkbox"/> |
| 15. <b>Avtagande förmåga/frekvens att prestera sexuellt</b> .....                                                                                                                                                                                                             | <input type="checkbox"/> |
| 16. <b>Minskat antal morgonerektioner</b> .....                                                                                                                                                                                                                               | <input type="checkbox"/> |
| 17. <b>Avtagande begär/könsdrift</b> (bristande sexuell njutning,<br>bristande begär för att ha samlag) .....                                                                                                                                                                 | <input type="checkbox"/> |
| <b>Har du några andra svårare symtom?</b>                                                                                                                                                                                                                                     | Ja .....                 | <input type="checkbox"/> | Nej .....                | <input type="checkbox"/> |                          |
| <b>Om Ja, var vänlig och beskriv:</b> _____                                                                                                                                                                                                                                   |                          |                          |                          |                          |                          |
| _____                                                                                                                                                                                                                                                                         |                          |                          |                          |                          |                          |

TACK FÖR DIN MEDVERKAN
