# Supplementary material
Source: PubMed Central journal article supplement (PMC155679)
Supplement: 1477-7525-1-15-S4.pdf [file 1477-7525-1-15-S4.pdf]

## IKÄÄNTYVÄN MIEHEN OIRELOMAKE (AMS)

Mitä seuraavista oireista teillä on ollut viime aikoina? Sulkeissa esimerkkejä oireiden selitykseksi. Olkaa hyvä ja laittakaa jokaisen oireen kohdalla rasti siihen ruutuun, joka parhaiten vastaa kokemanne oireen voimakkuutta. Jos teillä ei ole oiretta, rastittakaa ruutu "ei".

Oireiden voimakkuus:

| Oire                                                                                                                                                                                                                                                                              | Ei                       | vähän                    | kohta-<br>laisesti       | selvästi                 | erittäin<br>selvästi     |
|-----------------------------------------------------------------------------------------------------------------------------------------------------------------------------------------------------------------------------------------------------------------------------------|--------------------------|--------------------------|--------------------------|--------------------------|--------------------------|
|                                                                                                                                                                                                                                                                                   | 1                        | 2                        | 3                        | 4                        | 5                        |
| 1. <b>Yleisen hyvinvoinnin huononeminen</b><br>(terveydentila, koettu yleistilanne) .....                                                                                                                                                                                         | <input type="checkbox"/> |
| 2. <b>Nivel- ja lihasvaivat</b> (kipuja alaselässä,<br>nivelissä ja jaloissa) .....                                                                                                                                                                                               | <input type="checkbox"/> |
| 3. <b>Hikoilu</b> (hikoilupuuskat, kuumat aallot) .....                                                                                                                                                                                                                           | <input type="checkbox"/> |
| 4. <b>Unihäiriöt</b> (nukahtamistaipumus, ylösnousuvaikkeudet,<br>liian aikainen ylösnousu, unettomuus) .....                                                                                                                                                                     | <input type="checkbox"/> |
| 5. <b>Lisääntynyt unentarve</b><br>(usein väsynyt) .....                                                                                                                                                                                                                          | <input type="checkbox"/> |
| 6. <b>Ärtynisyys</b> (huumorintajuttomuus, ärtymys<br>pienistä syistä, helposti vihaiseksi tai äkäiseksi tulo) .....                                                                                                                                                              | <input type="checkbox"/> |
| 7. <b>Hermostuneisuus</b> (sisäinen paine, levottomuus,<br>kyvyttömyys pysyä rauhallisena ja rentoutuneena) .....                                                                                                                                                                 | <input type="checkbox"/> |
| 8. <b>Huolestuneisuus</b> (paniikki) .....                                                                                                                                                                                                                                        | <input type="checkbox"/> |
| 9. <b>Näätymys/vähentynyt energia</b><br>(yleisesti rajoittunut toiminta, vähentynyt aktiivisuus,<br>vähentynyt mielenkiinto asioiden tekemiseen, kokemus,<br>vähäisistä saavutuksista, tarve tulla epätavallisen<br>voimakkaasti kiihdytetyksi toiminnan aikaansaamiseksi) ..... | <input type="checkbox"/> |
| 10. <b>Lihavoiman vähentyminen</b> (heikkous) .....                                                                                                                                                                                                                               | <input type="checkbox"/> |
| 11. <b>Masentunut mieli</b> (lannistuneisuus, surullisuus,<br>itkuisuus, vetämättömyys, usein toistuvat mieliala-<br>vaihtelut, tarkoituksettomuuden tunne) .....                                                                                                                 | <input type="checkbox"/> |
| 12. <b>Tunne elämän lakipisteen ohittamisesta</b> .....                                                                                                                                                                                                                           | <input type="checkbox"/> |
| 13. <b>Kuoleman toive, kuolleen pisteen saavuttaminen,<br/>täydellinen lannistuminen</b> .....                                                                                                                                                                                    | <input type="checkbox"/> |
| 14. <b>Parran kasvun väheneminen</b> .....                                                                                                                                                                                                                                        | <input type="checkbox"/> |
| 15. <b>Potenssin väheneminen</b> .....                                                                                                                                                                                                                                            | <input type="checkbox"/> |
| 16. <b>Siittimen aamujäykistymisten väheneminen</b> .....                                                                                                                                                                                                                         | <input type="checkbox"/> |
| 17. <b>Seksuaalisen halukkuuden ja toiminnan<br/>väheneminen</b> .....                                                                                                                                                                                                            | <input type="checkbox"/> |

\_\_\_\_\_

\_\_\_\_\_
