# Supplementary material
Source: PubMed Central journal article supplement (PMC155679)
Supplement: 1477-7525-1-15-S6.pdf [file 1477-7525-1-15-S6.pdf]

## Vragenlijst over klachten van ouder wordende mannen (AMS – Vragenlijst)

Welke van de volgende klachten heeft u nu, vergeleken met de tijd dat u jonger dan 40 jaar oud was? Wilt u bij elke klacht aankruisen, in welke mate u er last van heeft. Wanneer u een klacht niet heeft, kruist u dan alstublieft „geen“ aan.

### Klachten:

|                                                                                                                                                                                                                                                                                         | geen                     | licht                    | middel<br>matig-         | hevig                    | zeer<br>hevig            |
|-----------------------------------------------------------------------------------------------------------------------------------------------------------------------------------------------------------------------------------------------------------------------------------------|--------------------------|--------------------------|--------------------------|--------------------------|--------------------------|
|                                                                                                                                                                                                                                                                                         | -----                    | -----                    | -----                    | -----                    | -----                    |
| Score =                                                                                                                                                                                                                                                                                 | 1                        | 2                        | 3                        | 4                        | 5                        |
| 1. <b>Verslechtering van uw algemeen welzijn</b><br>(gezondheidstoestand, subjectief gevoel m.b.t gezondheid) ....                                                                                                                                                                      | <input type="checkbox"/> |
| 2. <b>Gewrichts- en spierklachten</b> (lage rugpijn,<br>gewrichtspijn, pijn in de ledematen, algemene rugpijn) .....                                                                                                                                                                    | <input type="checkbox"/> |
| 3. <b>Overmatig zweten</b> (onverwacht/plotseling uitbreken van<br>zweet, opvliegers onafhankelijk van inspanning/belasting).....                                                                                                                                                       | <input type="checkbox"/> |
| 4. <b>Slaapproblemen</b> (moeite om in slaap te vallen, moeite<br>om door te slapen, te vroeg en vermoeid wakker worden,<br>slecht slapen, slapeloosheid) .....                                                                                                                         | <input type="checkbox"/> |
| 5. <b>Toegenomen behoefte aan slaap, vaak moe</b> .....                                                                                                                                                                                                                                 | <input type="checkbox"/> |
| 6. <b>Prikkelbaarheid</b> (een agressief gevoel, gauw boos/<br>geïrriteerd door kleine dingen, ontstemd) .....                                                                                                                                                                          | <input type="checkbox"/> |
| 7. <b>Nervositeit</b> (innerlijke spanning, innerlijke onrust,<br>niet stil kunnen zitten) .....                                                                                                                                                                                        | <input type="checkbox"/> |
| 8. <b>Angst</b> (paniekerig, angstig, bezorgd) .....                                                                                                                                                                                                                                    | <input type="checkbox"/> |
| 9. <b>Lichamelijke uitputting/afnemen van vitaliteit</b><br>(algemene afname van prestatie, afname van activiteit,<br>gebrek aan zin om iets te ondernemen, het gevoel<br>minder voor elkaar te krijgen, minder te presteren,<br>zichzelf te moeten aansporen iets te ondernemen) ..... | <input type="checkbox"/> |
| 10. <b>Afname van spierkracht</b> (gevoel van zwakte) .....                                                                                                                                                                                                                             | <input type="checkbox"/> |
| 11. <b>Gedeprimeerde stemming</b> (moedeloosheid, verdrietig,<br>huilerig, gebrek aan energie, stemmingswisselingen,<br>het gevoel dat niets er toe doet).....                                                                                                                          | <input type="checkbox"/> |
| 12. <b>Het gevoel dat je over de top van je leven heen bent</b> .....                                                                                                                                                                                                                   | <input type="checkbox"/> |
| 13. <b>Opgebrand voelen, op een dood punt zitten</b> .....                                                                                                                                                                                                                              | <input type="checkbox"/> |
| 14. <b>Verminderde baardgroei</b> .....                                                                                                                                                                                                                                                 | <input type="checkbox"/> |
| 15. <b>Afnemen van potentie/seksueel vermogen</b> .....                                                                                                                                                                                                                                 | <input type="checkbox"/> |
| 16. <b>Afname van het aantal ochtenderecties</b> .....                                                                                                                                                                                                                                  | <input type="checkbox"/> |
| 17. <b>Afname van zin in seks/libido</b> (gebrek aan plezier<br>in seks, gebrek aan zin in geslachtsgemeenschap) .....                                                                                                                                                                  | <input type="checkbox"/> |

Heeft u nog andere belangrijke klachten?

Ja .....

Nee .....

Indien ja, namelijk: \_\_\_\_\_

HARTELIJK DANK VOOR UW MEDEWERKING
