# Supplementary material
Source: PubMed Central journal article supplement (PMC155679)
Supplement: 1477-7525-1-15-S7.pdf [file 1477-7525-1-15-S7.pdf]

## Questionnaire AMS

### Versión española del cuestionario AMS

¿Cuales de los siguientes síntomas se aplican a su caso en este momento? Por favor, marque con una cruz la casilla apropiada para cada síntoma. Para los síntomas que no se apliquen a su caso, marque "ninguno".

**Síntomas:**

|                                                                                                                                                                                                                                                                      | extremadamente           |                          |                          |                          |                          |
|----------------------------------------------------------------------------------------------------------------------------------------------------------------------------------------------------------------------------------------------------------------------|--------------------------|--------------------------|--------------------------|--------------------------|--------------------------|
| ninguno                                                                                                                                                                                                                                                              | leve                     | moderado                 | grave                    | grave                    | grave                    |
|                                                                                                                                                                                                                                                                      | -----                    | -----                    | -----                    | -----                    | -----                    |
| Puntuación =                                                                                                                                                                                                                                                         | 1                        | 2                        | 3                        | 4                        | 5                        |
| 1. <b>Disminución de su sensación de bienestar general</b><br>(estado de salud general, sentimiento subjetivo).....                                                                                                                                                  | <input type="checkbox"/> |
| 2. <b>Dolor en las articulaciones y dolor muscular</b> (dolor en la parte inferior de la espalda, dolor en las articulaciones, dolor en una extremidad, dolor de espalda en general) .....                                                                           | <input type="checkbox"/> |
| 3. <b>Sudor excesivo</b> (episodios de sudor inesperados/repentinos, sofocos no relacionados con el esfuerzo).....                                                                                                                                                   | <input type="checkbox"/> |
| 4. <b>Problemas de sueño</b> (dificultad para quedarse dormido, dificultad para dormir de un tirón, se despierta temprano y se siente cansado, sueño ligero, insomnio) .....                                                                                         | <input type="checkbox"/> |
| 5. <b>Mayor necesidad de dormir, a menudo se siente cansado</b> .....                                                                                                                                                                                                | <input type="checkbox"/> |
| 6. <b>Irritabilidad</b> (se siente agresivo, se enfada fácilmente por pequeñas cosas, malhumorado) .....                                                                                                                                                             | <input type="checkbox"/> |
| 7. <b>Nerviosismo</b> (tensión interior, agitación, se siente inquieto) .....                                                                                                                                                                                        | <input type="checkbox"/> |
| 8. <b>Ansiedad</b> (sentimiento de pánico).....                                                                                                                                                                                                                      | <input type="checkbox"/> |
| 9. <b>Agotamiento físico/falta de vitalidad</b> (disminución general en el rendimiento, actividad reducida, falta de interés por las actividades de ocio, sensación de hacer o acabar menos cosas, de tener que forzarse a sí mismo para realizar actividades) ..... | <input type="checkbox"/> |
| 10. <b>Dismiunción</b> de la fuerza muscular (Sensación de debilidad).....                                                                                                                                                                                           | <input type="checkbox"/> |
| 11. <b>Estado de ánimo depresivo</b> (se siente desanimado, triste, a punto de llorar, con falta de energía, cambios de humor, sensación de que nada sirve para nada).....                                                                                           | <input type="checkbox"/> |
| 12. <b>Sensación de que ha pasado el mejor momento de su vida</b> .....                                                                                                                                                                                              | <input type="checkbox"/> |
| 13. <b>Se siente hundido, que ha tocado fondo</b> .....                                                                                                                                                                                                              | <input type="checkbox"/> |
| 14. <b>Disminución del crecimiento de la barba</b> .....                                                                                                                                                                                                             | <input type="checkbox"/> |
| 15. <b>Disminución de la capacidad/frecuencia de rendimiento sexual</b> .....                                                                                                                                                                                        | <input type="checkbox"/> |
| 16. <b>Disminución del número de erecciones matinales</b> .....                                                                                                                                                                                                      | <input type="checkbox"/> |
| 17. <b>Disminución del deseo sexual/libido</b><br>(falta de placer en el sexo, falta de deseo para el coito) .....                                                                                                                                                   | <input type="checkbox"/> |

¿Ha tenido algún otro síntoma? Si .....  No .....

Si la respuesta es Sí, descríballo: \_\_\_\_\_

**MUCHAS GRACIAS PARA SU COLABORACIÓN**
