# Supplementary material
Source: PubMed Central journal article supplement (PMC155679)
Supplement: 1477-7525-1-15-S8.pdf [file 1477-7525-1-15-S8.pdf]

| Quais dos seguintes sintomas se aplicam neste momento ao seu caso pessoal? Por favor assinale o quadrado apropriado para cada sintoma. Para os sintomas que não se aplicam ao seu caso, por favor assinale o quadrado "nenhum".                       |                                   |                          |                                   |                          |                          |
|-------------------------------------------------------------------------------------------------------------------------------------------------------------------------------------------------------------------------------------------------------|-----------------------------------|--------------------------|-----------------------------------|--------------------------|--------------------------|
| Sintomas:                                                                                                                                                                                                                                             | nenhum                            | ligeiro                  | moderado                          | grave                    | multíssimo grave         |
|                                                                                                                                                                                                                                                       | -----                             | -----                    | -----                             | -----                    | -----                    |
| Pontuação =                                                                                                                                                                                                                                           | 1                                 | 2                        | 3                                 | 4                        | 5                        |
| <b>1. Declínio da sua sensação de bem estar geral</b><br>(estado geral de saúde, sensação subjectiva).....                                                                                                                                            | <input type="checkbox"/>          | <input type="checkbox"/> | <input type="checkbox"/>          | <input type="checkbox"/> | <input type="checkbox"/> |
| <b>2. Dores nas articulações e dores musculares</b> , (dor na base das costas, dor nas articulações, dor num membro, dores de costas em geral).....                                                                                                   | <input type="checkbox"/>          | <input type="checkbox"/> | <input type="checkbox"/>          | <input type="checkbox"/> | <input type="checkbox"/> |
| <b>3. Sudação excessiva</b> (episódios inesperados/súbitos de sudação, afrontamentos independentes de esforço).....                                                                                                                                   | <input type="checkbox"/>          | <input type="checkbox"/> | <input type="checkbox"/>          | <input type="checkbox"/> | <input type="checkbox"/> |
| <b>4. Problemas de sono</b> (dificuldades em adormecer, dificuldades em dormir toda a noite, acordar cedo e sentir-se cansado, sono agitado, insónia).....                                                                                            | <input type="checkbox"/>          | <input type="checkbox"/> | <input type="checkbox"/>          | <input type="checkbox"/> | <input type="checkbox"/> |
| <b>5. Aumento da necessidade de dormir, sentir-se frequentemente cansado</b> .....                                                                                                                                                                    | <input type="checkbox"/>          | <input type="checkbox"/> | <input type="checkbox"/>          | <input type="checkbox"/> | <input type="checkbox"/> |
| <b>6. Irritabilidade</b> (sentir-se agressivo, facilmente perturbado com pequenas coisas, com humor instável).....                                                                                                                                    | <input type="checkbox"/>          | <input type="checkbox"/> | <input type="checkbox"/>          | <input type="checkbox"/> | <input type="checkbox"/> |
| <b>7. Nervosismo</b> (tensão interior, agitação, sentir-se desassossegado).....                                                                                                                                                                       | <input type="checkbox"/>          | <input type="checkbox"/> | <input type="checkbox"/>          | <input type="checkbox"/> | <input type="checkbox"/> |
| <b>8. Ansiedade</b> (sentimento de pânico).....                                                                                                                                                                                                       | <input type="checkbox"/>          | <input type="checkbox"/> | <input type="checkbox"/>          | <input type="checkbox"/> | <input type="checkbox"/> |
| <b>9. Exaustão física/Falta de vitalidade</b> (diminuição geral de performance, actividade reduzida, falta de interesse em actividades de lazer, sensação de produzir menos, de alcançar menos, de ter de se forçar para empreender actividades)..... | <input type="checkbox"/>          | <input type="checkbox"/> | <input type="checkbox"/>          | <input type="checkbox"/> | <input type="checkbox"/> |
| <b>10. Diminuição da força muscular</b> (sensação de fraqueza).....                                                                                                                                                                                   | <input type="checkbox"/>          | <input type="checkbox"/> | <input type="checkbox"/>          | <input type="checkbox"/> | <input type="checkbox"/> |
| <b>11. Estado de espírito depressivo</b> (sentir-se em baixo, triste, à beira das lágrimas, com falta de energia, alterações de humor, sensação de que nada vale a pena).....                                                                         | <input type="checkbox"/>          | <input type="checkbox"/> | <input type="checkbox"/>          | <input type="checkbox"/> | <input type="checkbox"/> |
| <b>12. Sensação de que já passou o seu ponto máximo</b> .....                                                                                                                                                                                         | <input type="checkbox"/>          | <input type="checkbox"/> | <input type="checkbox"/>          | <input type="checkbox"/> | <input type="checkbox"/> |
| <b>13. Sentir-se esgotado/sentir que chegou ao ponto mais baixo</b> .....                                                                                                                                                                             | <input type="checkbox"/>          | <input type="checkbox"/> | <input type="checkbox"/>          | <input type="checkbox"/> | <input type="checkbox"/> |
| <b>14. Diminuição do crescimento da barba</b> .....                                                                                                                                                                                                   | <input type="checkbox"/>          | <input type="checkbox"/> | <input type="checkbox"/>          | <input type="checkbox"/> | <input type="checkbox"/> |
| <b>15. Diminuição da capacidade/frequência do desempenho sexual..</b>                                                                                                                                                                                 | <input type="checkbox"/>          | <input type="checkbox"/> | <input type="checkbox"/>          | <input type="checkbox"/> | <input type="checkbox"/> |
| <b>16. Diminuição do número de erecções matinais</b> .....                                                                                                                                                                                            | <input type="checkbox"/>          | <input type="checkbox"/> | <input type="checkbox"/>          | <input type="checkbox"/> | <input type="checkbox"/> |
| <b>17. Diminuição do desejo sexual/do libido</b> (ausência de prazer no sexo, ausência de desejo de relações sexuais).....                                                                                                                            | <input type="checkbox"/>          | <input type="checkbox"/> | <input type="checkbox"/>          | <input type="checkbox"/> | <input type="checkbox"/> |
| Tem mais alguns sintomas importantes?                                                                                                                                                                                                                 | Sim..... <input type="checkbox"/> |                          | Não..... <input type="checkbox"/> |                          |                          |
| <b>Se sim, por favor descreva-os</b><br>_____                                                                                                                                                                                                         |                                   |                          |                                   |                          |                          |
| <b>Muito obrigada pela sua colaboração</b>                                                                                                                                                                                                            |                                   |                          |                                   |                          |                          |
