# Supplementary material
Source: PubMed Central journal article supplement (PMC155679)
Supplement: 1477-7525-1-15-S9.pdf [file 1477-7525-1-15-S9.pdf]

Di quali tra i disturbi elencati qui di seguito le capita di soffrire in questo periodo? Per favore, metta una 'X' nella casella appropriata, per ogni sintomo. Per i disturbi di cui non soffre, per favore segni "nessuno".

| Disturbi:                                                                                                                                                                                                                                                                                                               | estremamente             |                          |                          |                          |                          |
|-------------------------------------------------------------------------------------------------------------------------------------------------------------------------------------------------------------------------------------------------------------------------------------------------------------------------|--------------------------|--------------------------|--------------------------|--------------------------|--------------------------|
|                                                                                                                                                                                                                                                                                                                         | nessuno                  | leggero                  | moderato                 | grave                    | grave                    |
|                                                                                                                                                                                                                                                                                                                         | -----                    | -----                    | -----                    | -----                    | -----                    |
| Voti =                                                                                                                                                                                                                                                                                                                  | 1                        | 2                        | 3                        | 4                        | 5                        |
| 1. <b>Diminuzione della sensazione di benessere generale</b><br>(stato di salute complessivo, sensazione soggettiva).....                                                                                                                                                                                               | <input type="checkbox"/> |
| 2. <b>Dolori alle giunture e dolori muscolari</b> (mal di schiena, dolori alle giunture, dolori ad un arto, dolori alle spalle in genere) .....                                                                                                                                                                         | <input type="checkbox"/> |
| 3. <b>Sudorazione eccessiva</b> (episodi inaspettati/improvvisi di sudorazione, vampate di calore improvvise non dovute a sforzi).....                                                                                                                                                                                  | <input type="checkbox"/> |
| 4. <b>Problemi di sonno</b> (difficoltà ad addormentarsi, difficoltà a rimanere addormentato, alzarsi presto sentendosi stanco, scarsa qualità del sonno, insonnia) .....                                                                                                                                               | <input type="checkbox"/> |
| 5. <b>Aumentato bisogno di sonno, sentirsi spesso stanco</b> .....                                                                                                                                                                                                                                                      | <input type="checkbox"/> |
| 6. <b>Irritabilità</b> (sentirsi aggressivo, facilmente irritato da piccole cose, cambiamenti di umore) .....                                                                                                                                                                                                           | <input type="checkbox"/> |
| 7. <b>Nervosismo</b> (tensione interna, irrequietezza, sensazione di nervosismo) .....                                                                                                                                                                                                                                  | <input type="checkbox"/> |
| 8. <b>Ansietà</b> (sensazione di panico) .....                                                                                                                                                                                                                                                                          | <input type="checkbox"/> |
| 9. <b>Esaurimento fisico / perdita di vitalità</b> (diminuzione complessiva delle prestazioni, riduzione di attività, mancanza di interessi nel tempo libero, sensazione di avere fatto meno del dovuto, di avere ottenuto pochi risultati, di aver bisogno di far forza su se stesso per svolgere delle attività)..... | <input type="checkbox"/> |
| 10. <b>Diminuzione di forza muscolare</b> (sensazione di debolezza)....                                                                                                                                                                                                                                                 | <input type="checkbox"/> |
| 11. <b>Depressione</b> (sentirsi giù, triste, sul punto di piangere, mancanza di stimoli, sbalzi d'umore, la sensazione che niente sia importante) .....                                                                                                                                                                | <input type="checkbox"/> |
| 12. <b>Sensazione di avere superato il proprio periodo migliore</b> ...                                                                                                                                                                                                                                                 | <input type="checkbox"/> |
| 13. <b>Sentirsi scoppiati, avere toccato il fondo</b> .....                                                                                                                                                                                                                                                             | <input type="checkbox"/> |
| 14. <b>Diminuzione nella crescita della barba</b> .....                                                                                                                                                                                                                                                                 | <input type="checkbox"/> |
| 15. <b>Diminuzione delle capacità/frequenza delle attività sessuali</b> .....                                                                                                                                                                                                                                           | <input type="checkbox"/> |
| 16. <b>Diminuzione delle erezioni mattutine</b> .....                                                                                                                                                                                                                                                                   | <input type="checkbox"/> |
| 17. <b>Diminuzione del desiderio sessuale/ della libido</b><br>(mancanza di piacere nel sesso, mancanza di desiderio per i rapporti sessuali) .....                                                                                                                                                                     | <input type="checkbox"/> |
| <b>Ha sofferto di qualche altro disturbo grave?</b> .....                                                                                                                                                                                                                                                               | <b>Sì</b> .....          | <input type="checkbox"/> | <b>No</b> .....          | <input type="checkbox"/> |                          |
| <b>Se sì, per favore lo descriva:</b> _____                                                                                                                                                                                                                                                                             |                          |                          |                          |                          |                          |

LA RINGRAZIAMO PER LA SUA COLLABORAZIONE
