# Supplementary material
Source: PubMed Central journal article supplement (PMC155679)
Supplement: 1477-7525-1-15-S10.pdf [file 1477-7525-1-15-S10.pdf]

## AMS Опросник

Какие из симптомов наблюдаются у Вас в настоящее время? Пожалуйста, отметьте соответствующие квадратики для каждого симптома. Отсутствующие симптомы отметьте в квадратике «нет».

| Симптомы:                                                                                                                                                                                                                                                                                           | нет                      | слабые                   | умерен-<br>ные           | выра-<br>жен-<br>ные     | очень<br>выра-<br>женные |
|-----------------------------------------------------------------------------------------------------------------------------------------------------------------------------------------------------------------------------------------------------------------------------------------------------|--------------------------|--------------------------|--------------------------|--------------------------|--------------------------|
|                                                                                                                                                                                                                                                                                                     | -----                    | -----                    | -----                    | -----                    | -----                    |
| Баллы=                                                                                                                                                                                                                                                                                              | 1                        | 2                        | 3                        | 4                        | 5                        |
| 1. <b>Ухудшение самочувствия и общего состояния</b><br>(общее состояние здоровья, субъективные ощущения).....                                                                                                                                                                                       | <input type="checkbox"/> |
| 2. <b>Боли в сочленениях и мышечные боли</b><br>(боли в нижней части спины, боли в сочленениях,<br>боли в пояснице, боли по всей спине ) .....                                                                                                                                                      | <input type="checkbox"/> |
| 3. <b>Повышенная потливость</b> (неожиданные/внезапные<br>периоды повышенного потоотделения, приливы жара,<br>независимые от степени напряжения) .....                                                                                                                                              | <input type="checkbox"/> |
| 4. <b>Проблемы со сном</b> (трудности с засыпанием, на<br>протяжении сна, ранним пробуждением, чувство<br>усталости, плохой сон, бессонница).....                                                                                                                                                   | <input type="checkbox"/> |
| 5. <b>Повышенная потребность в сне,<br/>частое ощущение усталости</b> .....                                                                                                                                                                                                                         | <input type="checkbox"/> |
| 6. <b>Раздражительность</b> (ощущения агрессивности,<br>раздражения по пустякам, уныние) .....                                                                                                                                                                                                      | <input type="checkbox"/> |
| 7. <b>Нервозность</b><br>(внутреннее напряжение, суетливость, беспокойство).....                                                                                                                                                                                                                    | <input type="checkbox"/> |
| 8. <b>Тревожность</b> (приступы паники) .....                                                                                                                                                                                                                                                       | <input type="checkbox"/> |
| 9. <b>Физическое истощение / упадок жизненных сил</b><br>(общее снижение работоспособности , пониженная<br>активность, отсутствие интереса к занятиям досуга,<br>сниженная самооценка, неудовлетворенность<br>сделанным, достигнутым, необходимость заставлять)<br>себя проявлять активность) ..... | <input type="checkbox"/> |
| 10. <b>Снижение мышечной силы</b> (ощущение слабости) .....                                                                                                                                                                                                                                         | <input type="checkbox"/> |
| 11. <b>Депрессия</b> (чувство подавленности, грусти, слезливость,<br>отсутствие стимулов, колебания в настроения,<br>чувство бесполезности).....                                                                                                                                                    | <input type="checkbox"/> |
| 12. <b>Ощущение, что жизненный пик пройден</b> .....                                                                                                                                                                                                                                                | <input type="checkbox"/> |
| 13. <b>Опущенность, ощущение «дошел до ручки»</b> .....                                                                                                                                                                                                                                             | <input type="checkbox"/> |
| 14. <b>Уменьшение роста бороды</b> .....                                                                                                                                                                                                                                                            | <input type="checkbox"/> |
| 15. <b>Снижение способности и частоты сексуальных<br/>отношений</b> .....                                                                                                                                                                                                                           | <input type="checkbox"/> |
| 16. <b>Снижение количества утренних эрекций</b> .....                                                                                                                                                                                                                                               | <input type="checkbox"/> |
| 17. <b>Снижение сексуального желания / либидо</b><br>(отсутствие удовольствия от секса,<br>отсутствие желания сексуальных контактов) .....                                                                                                                                                          | <input type="checkbox"/> |

Наблюдайте ли Вы у себя какие-либо другие заметные симптомы? да ☐ ..... нет..... ☐

Если «да», опишите: \_\_\_\_\_

Большое спасибо за сотрудничество.
