# Supplementary material
Source: PubMed Central journal article supplement (PMC155679)
Supplement: 1477-7525-1-15-S11.pdf [file 1477-7525-1-15-S11.pdf]

**男性の老化症状に関する質問票**  
(Japanese version of the AMS Questionnaire)

現在あなたにあてはまる以下の症状がありますか。あてはまる症状の程度を「✓」印でご記入下さい。もしも、あてはまる症状がない場合は、「なし」の項に「✓」印をご記入ください。

| 症状：                                                          | なし                       | 軽い                       | 中程度                      | 重い                       | 非常に<br>重い                |
|--------------------------------------------------------------|--------------------------|--------------------------|--------------------------|--------------------------|--------------------------|
|                                                              | ..... I .....            |
| 点数＝                                                          | 1                        | 2                        | 3                        | 4                        | 5                        |
| <b>1. 総合的に調子が思わしくない</b><br>(健康状態、本人自身の感じ方)                   | <input type="checkbox"/> |
| <b>2. 関節や筋肉の痛み</b><br>(腰痛、関節痛、手足の痛み、背中の痛み)                   | <input type="checkbox"/> |
| <b>3. ひどい発汗</b><br>(思いがけず突然汗が出る。緊張や運動とは関係なくほてる)              | <input type="checkbox"/> |
| <b>4. 睡眠の悩み</b><br>(寝つきが悪い、ぐっすり眠れない、寝起きが早く疲れがとれない、浅い睡眠、眠れない) | <input type="checkbox"/> |
| <b>5. よく眠くなる、しばしば疲れを感じる</b>                                  | <input type="checkbox"/> |
| <b>6. いらいらする</b><br>(当たり散らす、些細なことに直ぐ腹を立てる、不機嫌になる)            | <input type="checkbox"/> |
| <b>7. 神経質になった</b><br>(緊張しやすい、精神的に落ち着かない、じっとしてられない)           | <input type="checkbox"/> |
| <b>8. 不安感</b><br>(パニック状態になる)                                 | <input type="checkbox"/> |

| 症状：                                                                    | なし<br>.....I.....I.....I.....I.....I.....<br>1 | 軽い<br>I.....I.....I.....I.....I.....<br>2 | 中程度<br>I.....I.....I.....I.....I.....<br>3 | 重い<br>I.....I.....I.....I.....I.....<br>4 | 非常に<br>重い<br>I.....I.....I.....I.....I.....<br>5 |
|------------------------------------------------------------------------|------------------------------------------------|-------------------------------------------|--------------------------------------------|-------------------------------------------|--------------------------------------------------|
| 9.からだの疲労や行動力の減退<br>(全般的な行動力の低下、活動の減少、余暇活動に興味がない、達成感がない、自分をせかせないと何もしない) | <input type="checkbox"/>                       | <input type="checkbox"/>                  | <input type="checkbox"/>                   | <input type="checkbox"/>                  | <input type="checkbox"/>                         |
| 10.筋力の低下                                                               | <input type="checkbox"/>                       | <input type="checkbox"/>                  | <input type="checkbox"/>                   | <input type="checkbox"/>                  | <input type="checkbox"/>                         |
| 11.憂うつな気分<br>(落ち込み、悲しみ、涙もろい、意欲がわかない、気分のむら、無用感)                         | <input type="checkbox"/>                       | <input type="checkbox"/>                  | <input type="checkbox"/>                   | <input type="checkbox"/>                  | <input type="checkbox"/>                         |
| 12.「人生の山は通り過ぎた」と感じる                                                    | <input type="checkbox"/>                       | <input type="checkbox"/>                  | <input type="checkbox"/>                   | <input type="checkbox"/>                  | <input type="checkbox"/>                         |
| 13.力尽きた、どん底にいると感じる                                                     | <input type="checkbox"/>                       | <input type="checkbox"/>                  | <input type="checkbox"/>                   | <input type="checkbox"/>                  | <input type="checkbox"/>                         |
| 14.ひげの伸びが遅くなった                                                         | <input type="checkbox"/>                       | <input type="checkbox"/>                  | <input type="checkbox"/>                   | <input type="checkbox"/>                  | <input type="checkbox"/>                         |
| 15.性的能力の衰え                                                             | <input type="checkbox"/>                       | <input type="checkbox"/>                  | <input type="checkbox"/>                   | <input type="checkbox"/>                  | <input type="checkbox"/>                         |
| 16.早朝勃起（朝立ち）の回数の減少                                                     | <input type="checkbox"/>                       | <input type="checkbox"/>                  | <input type="checkbox"/>                   | <input type="checkbox"/>                  | <input type="checkbox"/>                         |
| 17.性欲の低下<br>(セックスが楽しくない、性交の欲求がおきない)                                    | <input type="checkbox"/>                       | <input type="checkbox"/>                  | <input type="checkbox"/>                   | <input type="checkbox"/>                  | <input type="checkbox"/>                         |

その他に気になる症状がありますか？  ある   ない

「ある」と返答された方は、具体的にご記入ください： \_\_\_\_\_

\_\_\_\_\_

ご協力ありがとうございました。
