# Supplementary material
Source: PubMed Central journal article supplement (PMC155679)
Supplement: 1477-7525-1-15-S12.pdf [file 1477-7525-1-15-S12.pdf]

## 한국인 남성 갱년기 증상 설문지

아래의 항목 중 당신께서 갖고 계신 증상이 있다면 그 심한 정도를 주어진 네모 칸에 표시하십시오. 없는 증상에 대해서는 '없음'에 표시하십시오

|     |                                                                                                                                                      | 증상의 정도 |     |    |    |      |
|-----|------------------------------------------------------------------------------------------------------------------------------------------------------|--------|-----|----|----|------|
|     |                                                                                                                                                      | 없음     | 가벼움 | 보통 | 심함 | 매우심함 |
| 1.  | 몸 상태가 안 좋아진 느낌이다<br>(전반적인 건강에 대한 주관적인 느낌)                                                                                                            |        |     |    |    |      |
| 2.  | 관절과 근육이 아프다<br>(허리, 관절, 등이 아프거나 팔 다리가 쑤신다)                                                                                                           |        |     |    |    |      |
| 3.  | 땀이 지나치게 많이 난다<br>(갑자기 식은땀이 나거나 긴장하지 않아도 얼굴이 화끈거린다)                                                                                                   |        |     |    |    |      |
| 4.  | 수면장애가 있다<br>(잠들기 어렵거나, 자다가 자주 깨거나, 아침에 일찍 깨서 피곤하거나, 깊은 잠을 못자거나, 잠을 못 이룬다)                                                                            |        |     |    |    |      |
| 5.  | 수면시간이 늘지만 그래도 피곤하다                                                                                                                                   |        |     |    |    |      |
| 6.  | 잘 흥분한다<br>(공격적이거나, 사소한 일에 쉽게 화를 내거나, 번덕스럽다)                                                                                                          |        |     |    |    |      |
| 7.  | 신경이 과민하다<br>(긴장하거나, 들뜨거나, 조바심을 낸다)                                                                                                                   |        |     |    |    |      |
| 8.  | 항상 불안하다<br>(전전긍긍한다)                                                                                                                                  |        |     |    |    |      |
| 9.  | 신체적으로 기진맥진하고 활력이 떨어진다<br>(업무수행능력이 떨어지거나, 활발하지 못하거나, 여가활동에 무관심해지거나, 목표량을 달성하지 못하거나, 기력이 없어서 어떤 일을 억지로 해야만 하는 느낌, 즉 예를 들면 아플 때 일 때문에 직장에 억지로 나가는 느낌이다) |        |     |    |    |      |
| 10. | 근력이 저하되고 있다<br>(허약해진 느낌이다)                                                                                                                           |        |     |    |    |      |
| 11. | 기분이 우울하다<br>(기분이 가라앉거나, 슬프거나, 눈물이 맺히거나, 의욕이 없거나, 감정의 변화가 심하거나, 아무 쓸모가 없다고 느껴진다)                                                                      |        |     |    |    |      |
| 12. | 전성기가 지나버린 느낌이다                                                                                                                                       |        |     |    |    |      |

|                                                                                       |                                                                    | 증상의 정도 |     |    |    |      |
|---------------------------------------------------------------------------------------|--------------------------------------------------------------------|--------|-----|----|----|------|
|                                                                                       |                                                                    | 없음     | 가벼움 | 보통 | 심함 | 매우심함 |
| 13                                                                                    | 정서적으로 탈진한 느낌이다<br>(신체적, 정신적 고갈된 상태로 부정적 태도와 무력감 및 절망감등을 겪고있는 느낌이다) |        |     |    |    |      |
| 14                                                                                    | 수염이 자라는 속도가 떨어진다                                                   |        |     |    |    |      |
| 15                                                                                    | 정력이 떨어지고 성생활 횟수도 줄고있다                                              |        |     |    |    |      |
| 16                                                                                    | 아침에 발기되는 횟수가 줄고있다                                                  |        |     |    |    |      |
| 17                                                                                    | 성욕이 줄고 성적충동도 줄고있다<br>(성생활의 즐거움이 없어지거나, 성생활을 하고 싶은 욕망이 없어진다)        |        |     |    |    |      |
| <p>위의 증상들 이외에 다른 증상이 있습니까?            예            아니오</p> <p>있다면, 아래의 빈칸에 써주십시오:</p> |                                                                    |        |     |    |    |      |

설문에 응답해 주셔서 감사합니다
